# Supplementary material for: SPARCL1 promotes C2C12 cell differentiation via BMP7-mediated BMP/TGF-β cell signaling pathway
Source: PubMed Central journal article supplement (PMC6838091; doi:10.1038/s41419-019-2049-4), 2019-11-07
Supplement: 41419_2019_2049_MOESM1_ESM.pdf [file 41419_2019_2049_MOESM1_ESM.pdf]

Please complete the table below to indicate the contributions of all named authors to the figures.

Figure 1:

YuXin Wang, ShuaiYu Liu, HuiLi Tong

Figure 2:

YuXin Wang, ShuaiYu Liu, YunQin Yan, ShuFeng Li

Figure 3:

YuXin Wang, ShuaiYu Liu, YunQin Yan

Figure 4:

YuXin Wang, ShuaiYu Liu, ShuFeng Li

Figure 5:

YuXin Wang, ShuaiYu Liu

Figure 6:

YuXin Wang, ShuaiYu Liu

Signed for and on behalf of the Author(s):

Print Name:

Date:

YuXin Wang, ShuaiYu Liu,

YuXin Wang, ShuaiYu Liu,

2019/9/28

HuiLi Tong, YunQin Yan,

HuiLi Tong, YunQin Yan,

ShuFeng Li.

ShuFeng Li.
